# Supplementary material
Source: MDPI journal article supplement (https://www.mdpi.com/2077-0472/12/7/1062)
Supplement: s1 [file s1]

Table S1. Landsat 8 OLI and Sentinel 2A MSI products in this study

| Landsat 8 OLI   |                                                                  |
|-----------------|------------------------------------------------------------------|
| Years           | ProductID                                                        |
| 2018            | LC08_L2SP_160035_20180630_20200831_02_T1                         |
| 2019            | LC08_L2SP_160035_20190703_20200827_02_T1                         |
| 2020            | LC08_L2SP_160035_20200721_20200911_02_T1                         |
| 2021            | LC08_L2SP_160035_20210825_20210901_02_T1                         |
| Sentinel 2A MSI |                                                                  |
| 2019            | S2A_MSIL2A_20190703T064631_<br>N0212_R020_T40SFF_20190703T112808 |
| 2020            | S2A_MSIL2A_20200707T064631_<br>N0214_R020_T40SFF_20200707T112619 |
| 2021            | S2A_MSIL2A_20210831T064631_<br>N0301_R020_T40SFF_20210831T094435 |
