# Supplementary material
Source: MDPI journal article supplement (https://www.mdpi.com/2077-0472/12/7/1062)
Supplement: s1 [file s1]

Table S2. Final environmental variables used in model construction

| Target soil property      | Used environmental covariates                                          | Target soil property         | Used environmental covariates                                          | Training set                                                                                                                     | Validation set                                                                                                                  |
|---------------------------|------------------------------------------------------------------------|------------------------------|------------------------------------------------------------------------|----------------------------------------------------------------------------------------------------------------------------------|---------------------------------------------------------------------------------------------------------------------------------|
| Soil organic carbon (SOC) | Normalized difference vegetation index (NDVI) – Sentinel 2A MSI        | Available phosphorus (Ava-P) | Normalized difference vegetation index (NDVI) – Sentinel 2A MSI        | It consists of 201 observations. Each dataset contains 15 environmental variables, along with the target soil property (1 item). | It consists of 87 observations. Each dataset contains 15 environmental variables, along with the target soil property (1 item). |
|                           | Normalized clay index - Sentinel 2A MSI                                |                              | Normalized clay index - Landsat 8 OLI                                  |                                                                                                                                  |                                                                                                                                 |
|                           | Elevation (m)                                                          |                              | Elevation (m)                                                          |                                                                                                                                  |                                                                                                                                 |
|                           | Green Normalized Difference Vegetation Index [GNDVI] - Sentinel 2A MSI |                              | Green Normalized Difference Vegetation Index [GNDVI] - Landsat 8 OLI   |                                                                                                                                  |                                                                                                                                 |
|                           | Normalized difference vegetation index (NDVI) – Landsat 8 OLI          |                              | Normalized difference vegetation index (NDVI) – Landsat 8 OLI          |                                                                                                                                  |                                                                                                                                 |
|                           | Saturation index - Landsat 8 OLI                                       |                              | Saturation index - Landsat 8 OLI                                       |                                                                                                                                  |                                                                                                                                 |
|                           | Topsoil grain size index - Sentinel 2A MSI                             |                              | Normalized clay index - Sentinel 2A MSI                                |                                                                                                                                  |                                                                                                                                 |
|                           | Normalized clay index - Landsat 8 OLI                                  |                              | Topsoil grain size index - Sentinel 2A MSI                             |                                                                                                                                  |                                                                                                                                 |
|                           | Total Solar Radiation ( $\text{kJ m}^{-2} \text{ year}^{-1}$ )         |                              | BIO-1-Mean Annual Temperature (MAT) ( $^{\circ}\text{C}$ )             |                                                                                                                                  |                                                                                                                                 |
|                           | Green Normalized Difference Vegetation Index [GNDVI] - Landsat 8 OLI   |                              | Green Normalized Difference Vegetation Index [GNDVI] - Sentinel 2A MSI |                                                                                                                                  |                                                                                                                                 |
|                           | Topsoil grain size index - Landsat 8 OLI                               |                              | Clay map produced with Ordinary Kriging (%)                            |                                                                                                                                  |                                                                                                                                 |
|                           | BIO-1-Mean Annual Temperature (MAT) ( $^{\circ}\text{C}$ )             |                              | pH map produced with Ordinary Kriging                                  |                                                                                                                                  |                                                                                                                                 |
|                           | Saturation index - Sentinel 2A MSI                                     |                              | Sand map produced with Ordinary Kriging (%)                            |                                                                                                                                  |                                                                                                                                 |
|                           | Sand map produced with Ordinary Kriging (%)                            |                              | Topographic wetness index (TWI)                                        |                                                                                                                                  |                                                                                                                                 |
|                           | Flow Accumulation                                                      |                              | Slope (%)                                                              |                                                                                                                                  |                                                                                                                                 |
